# Supplementary material for: Stromal POSTN Enhances Motility of Both Cancer and Stromal Cells and Predicts Poor Survival in Colorectal Cancer
Source: MDPI journal article supplement (doi:10.3390/cancers15030606), 2023-01-18

**Table S1. Antibodies and Reagents for Immunohistochemistry, Immunoblotting and FACS analysis**

| Proteins        | IHC     |          | IB       |          | FACS     | Antibodies                                                 |
|-----------------|---------|----------|----------|----------|----------|------------------------------------------------------------|
|                 | Reagent | Dilution | Dilution | Dilution | Dilution |                                                            |
| ACTB            | -       | -        | 5,000    | -        | -        | AC-74, SIGMA (Rocklin, CA)                                 |
| AKT             | -       | -        | 1,000    | -        | -        | #9272, Cell signaling Technology, Inc. (Danvers, MA)       |
| P-AKT (Ser 473) | -       | -        | 1,000    | -        | -        | Clone D9E, Cell signaling Technology, Inc. (Danvers, MA)   |
| CCNA            | IV      | 100      | -        | -        | -        | sc-751, Santa Cruz Biothechnology, Inc. (Dallas, TX)       |
| Decorin         | OV      | 200      | -        | -        | -        | ab268048, Abcam (Cambridge, UK)                            |
| FAK             | -       | -        | 1,000    | -        | -        | Clone D2R2E, Cell Signaling Technology, Inc. (Danvers, MA) |
| P-FAK (Tyr 397) | -       | -        | 1,000    | -        | -        | Clone D20B1, Cell Signaling Technology, Inc. (Danvers, MA) |
| FAP             | BM      | 200      | -        | -        | -        | EPR20021, Abcam (Cambridge, UK)                            |
| Geminin         | OV      | 100      | -        | -        | -        | EPR14637, Abcam (Cambridge, UK)                            |
| ITGAV           | -       | -        | 1,000    | -        | -        | #4711, Cell Signaling Technology, Inc. (Danvers, MA)       |
| ITGA4           | -       | -        | 1,000    | -        | -        | Clone D2E1, Cell Signaling Technology, Inc. (Danvers, MA)  |
| ITGA5           | -       | -        | 1,000    | -        | -        | #4705, Cell Signaling Technology, Inc. (Danvers, MA)       |
| ITGA6           | -       | -        | 1,000    | -        | -        | #3750, Cell Signaling Technology, Inc. (Danvers, MA)       |
| ITGA6           | BM      | 500      | -        | -        | -        | EPR18124, Abcam (Cambridge, UK)                            |
| ITGA6           | -       | -        | -        | 20       | -        | FITC conjugated, #313605, BioLegend (San Diego, CA)        |
| ITGB1           | -       | -        | 1,000    | -        | -        | Clone D2E5, Cell Signaling Technology, Inc. (Danvers, MA)  |
| ITGB4           | BM      | 200      | 1,000    | -        | -        | Clone D8P6C, Cell Signaling Technology, Inc. (Danvers, MA) |
| ITGB4           | -       | -        | -        | 20       | -        | FITC conjugated, #327805, BioLegend (San Diego, CA)        |
| Ki-67           | OV      | 100      | -        | -        | -        | Clone MIB-1, Dako/Agilent (Santa Clara, CA)                |
| MLH1            | OV      | 200      | -        | -        | -        | Clone G168-728, BD Biosciences (Franklin Lakes, NJ)        |
| Mouse IgG2a     | -       | -        | -        | 20       | -        | FITC conjugated, #400209, BioLegend (San Diego, CA)        |
| MSH2            | OV      | 200      | -        | -        | -        | Clone G219-1129, BD Biosciences (Franklin Lakes, NJ)       |

|                   |           |     |       |    |                                                           |
|-------------------|-----------|-----|-------|----|-----------------------------------------------------------|
| MSH6              | OV        | 400 | -     | -  | Clone 44/MSH6, BD Biosciences (Franklin Lakes, NJ)        |
| Periostin         | BM        | 200 | 1,000 | -  | Ab92460, Abcam (Cambridge, UK)                            |
| PMS2              | OV+Linker | 50  | -     | -  | Clone A16-4, BD Biosciences (Franklin Lakes, NJ)          |
| PHH3              | OV        | 500 | -     | -  | Cell Marque™, Millipore SIGMA (Rocklin, CA)               |
| p53               | BM        | 100 | -     | -  | Clone DO7, Leica Biosystems (Wetzlar, Germany)            |
| α-SMA             | BM        | 600 | -     | -  | Clone 1A4, Dako/Agilent (Santa Clara, CA)                 |
| Stat3 α           | -         | -   | 1,000 | -  | #8768, Cell Signaling Technology, Inc. (Danvers, MA)      |
| P-Stat3 (Tyr 705) | -         | -   | 1,000 | -  | Clone D3A7, Cell Signaling Technology, Inc. (Danvers, MA) |
| P-Stat3 (Ser 727) | -         | -   | 1,000 | -  | #9134S, Cell Signaling Technology, Inc. (Danvers, MA)     |
| Rat IgG2a         | -         | -   | -     | 20 | FITC conjugated, #400505, BioLegend (San Diego, CA)       |

IHC, immunohistochemistry. IB, immunoblotting. FACS, fluorescent-activated cell sorting. IV, iView reagent. OV, OptiView reagent. BM, BondMax.

**Table S2. Survival analyses in Kaplan-Meier Plotter according to *POSTN* expression**

|                                        | Patient | Hazard | 95% CI |      | Log-rank |
|----------------------------------------|---------|--------|--------|------|----------|
|                                        | No.     | Ratio  | min    | max  | P-value  |
| Kidney papillary renal cell carcinoma  | 287     | 2.43   | 1.34   | 4.39 | 0.0025   |
| Esophageal adenocarcinoma              | 80      | 2.25   | 1.02   | 4.96 | 0.039    |
| Cervical squamous carcinoma            | 304     | 2.20   | 1.34   | 3.62 | 0.0014   |
| Stomach adenocarcinoma                 | 371     | 1.83   | 1.31   | 2.57 | 0.00031  |
| Pancreatic ductal adenocarcinoma       | 177     | 1.69   | 1.03   | 2.78 | 0.038    |
| Sarcoma                                | 259     | 1.66   | 1.11   | 2.47 | 0.012    |
| Hepatocellular carcinoma               | 370     | 1.66   | 1.17   | 2.36 | 0.0042   |
| Uterine endometrial carcinoma          | 542     | 1.63   | 1.05   | 2.53 | 0.027    |
| Bladder carcinoma                      | 404     | 1.57   | 1.12   | 2.20 | 0.0087   |
| Kidney clear cell renal cell carcinoma | 530     | 1.55   | 1.12   | 2.14 | 0.007    |
| Lung adenocarcinoma                    | 504     | 1.47   | 1.08   | 1.98 | 0.013    |
| Lung squamous cell carcinoma           | 495     | 1.48   | 1.13   | 1.94 | 0.0041   |
| Head-neck squamous cell carcinoma      | 499     | 1.37   | 1.04   | 1.79 | 0.022    |

RNA-seq data were analyzed using the Kaplan-Meier Plotter program on the web site. Note that no significant difference was detected in breast cancer, esophageal squamous cell carcinoma, ovarian cancer, pheochromocytoma and paraganglioma, rectal adenocarcinoma, testicular germ cell tumor, thymoma, and thyroid carcinoma.

**Figure S1.** Representative images for the measurement of POSTN expression

**Figure S1**

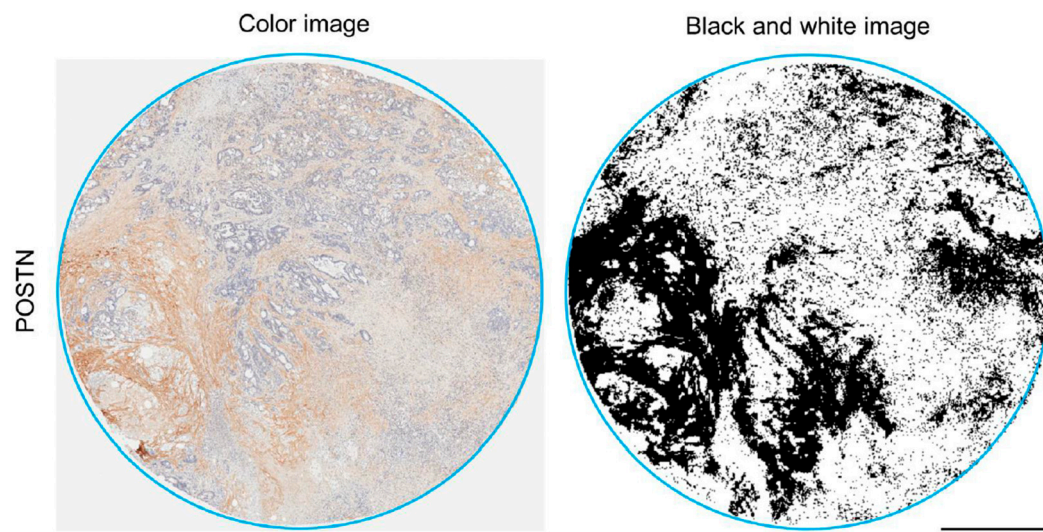

**Figure S2.** FACS analyses of CRC cells.

**Figure S2**

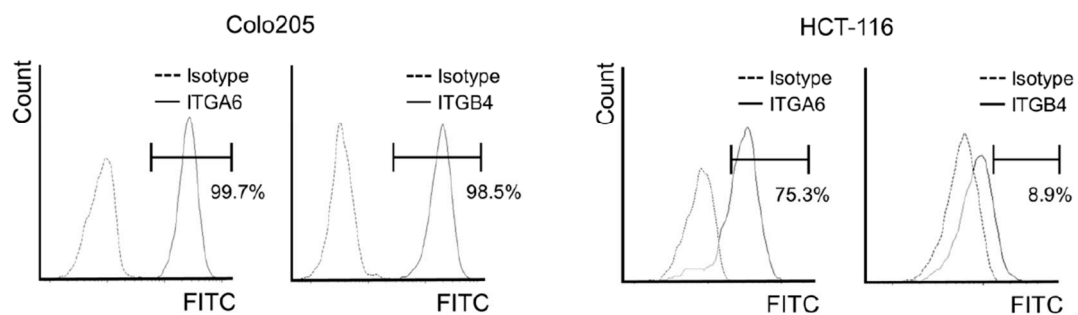

Supplement: s1 [file s1]
