# Supplementary figures and images for: Stromal POSTN Enhances Motility of Both Cancer and Stromal Cells and Predicts Poor Survival in Colorectal Cancer
Source: MDPI journal article supplement (doi:10.3390/cancers15030606), 2023-01-18

Figure 1a

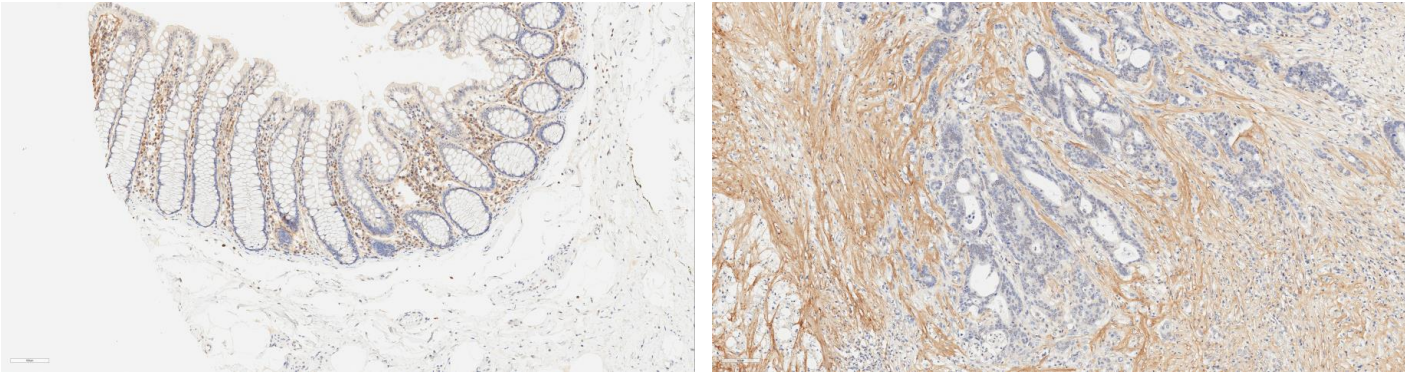

Figure 5a

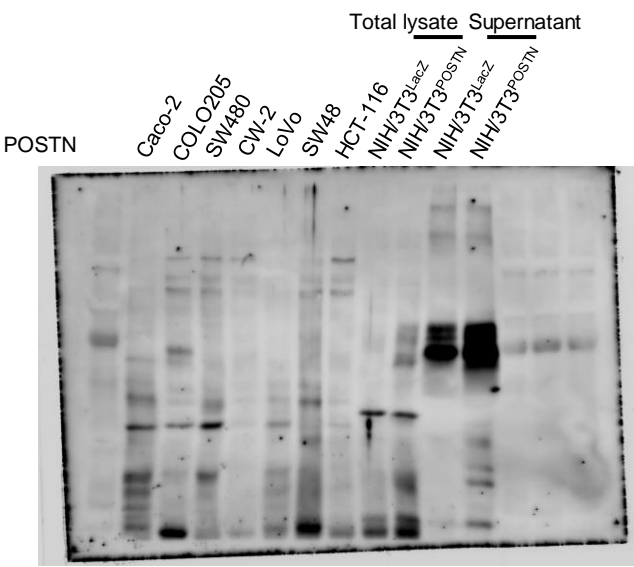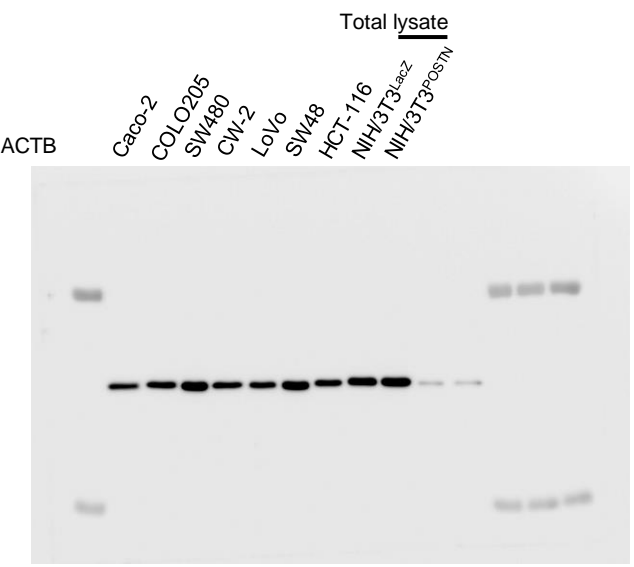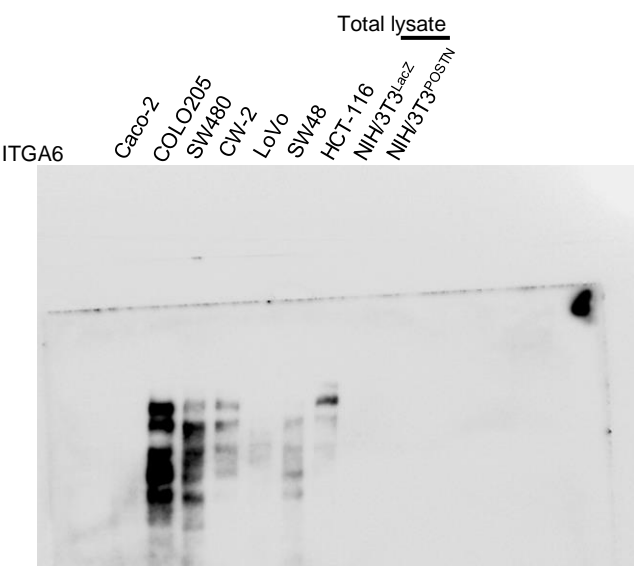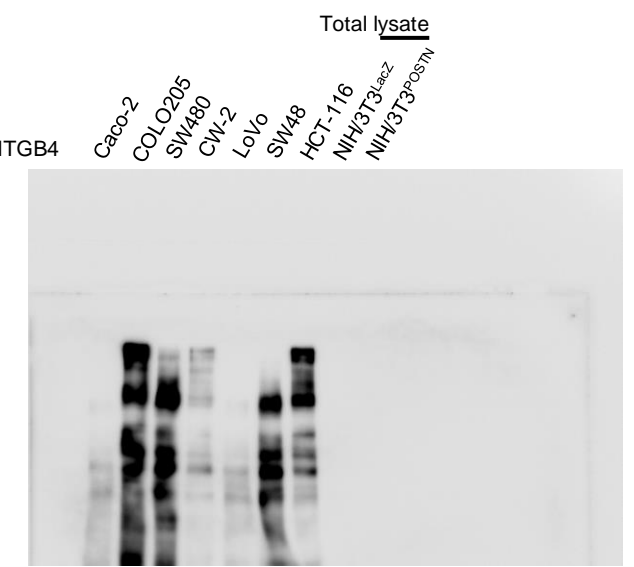

Figure 5c

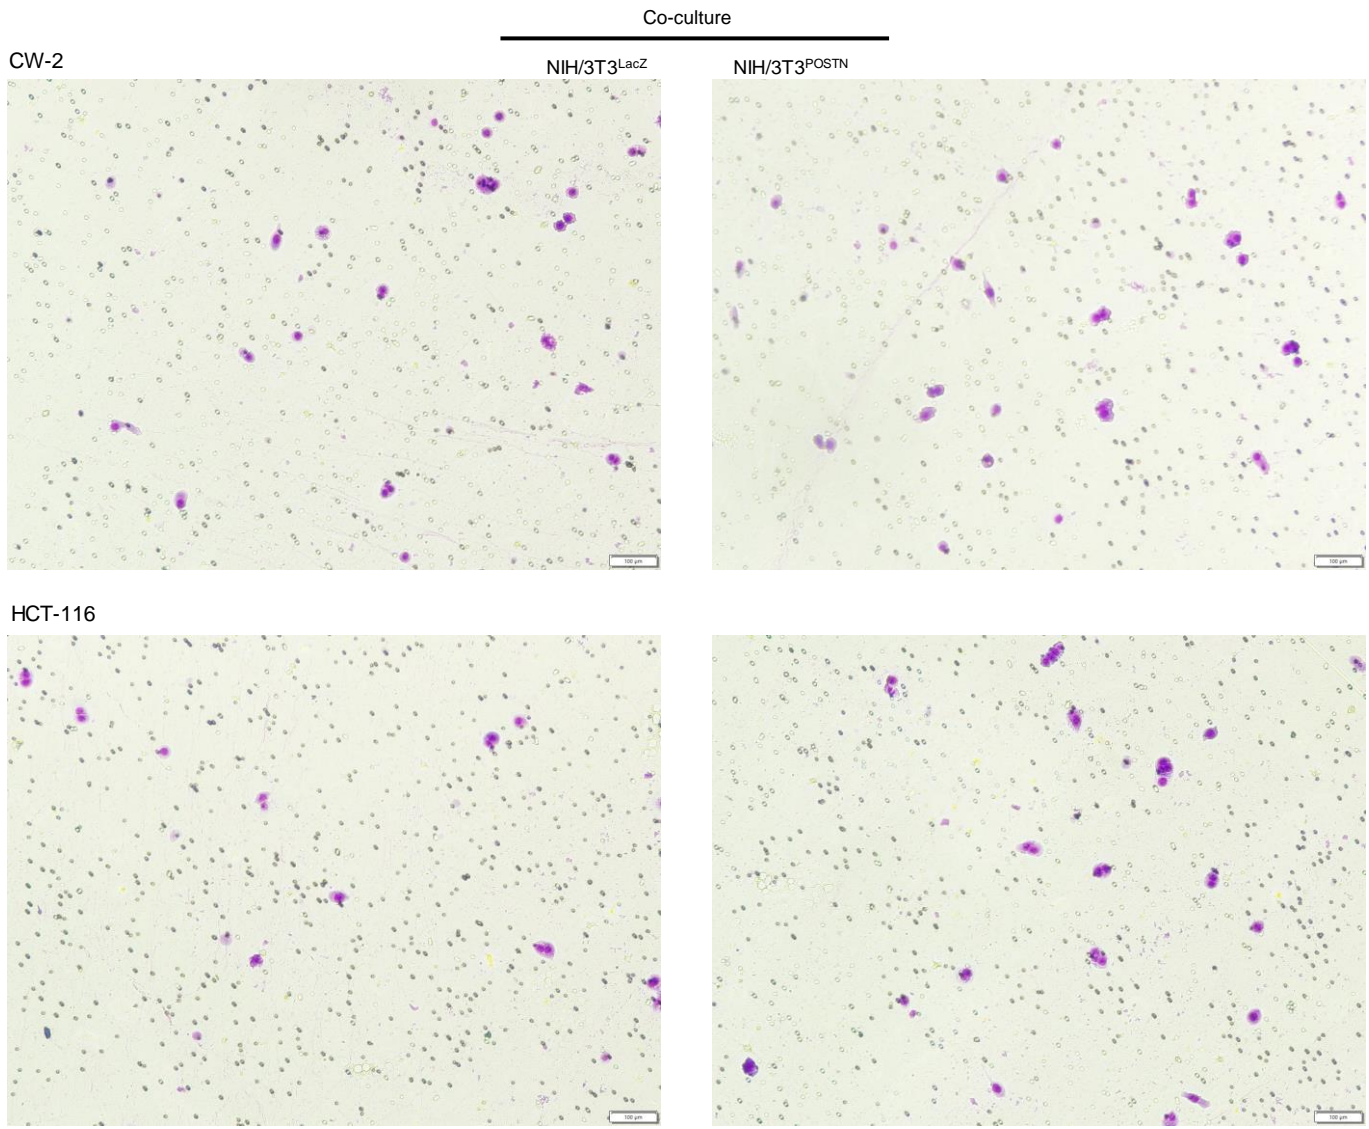

Figure 5g

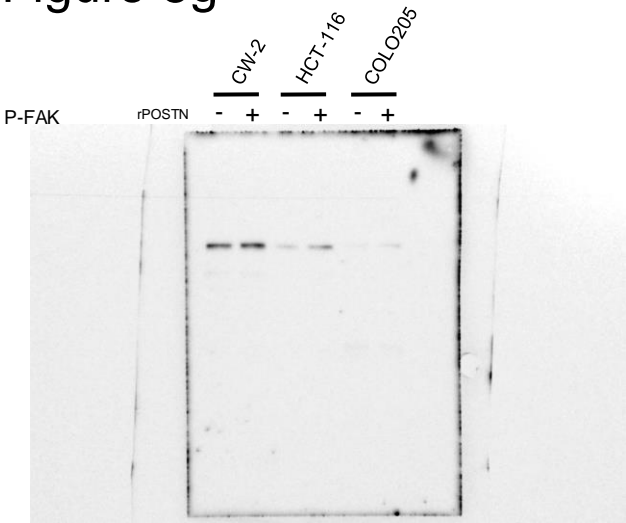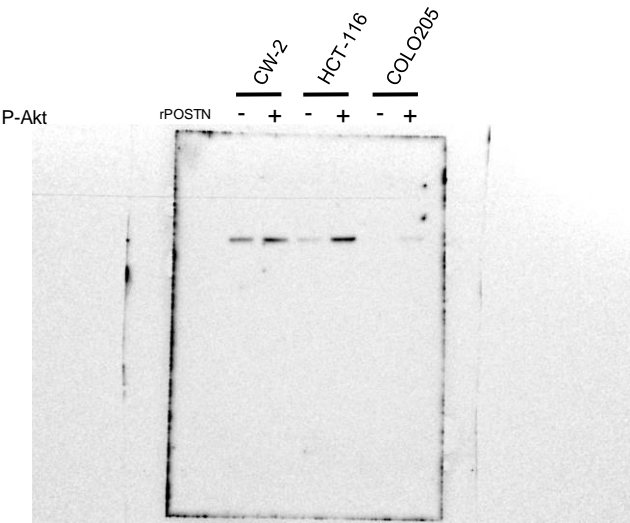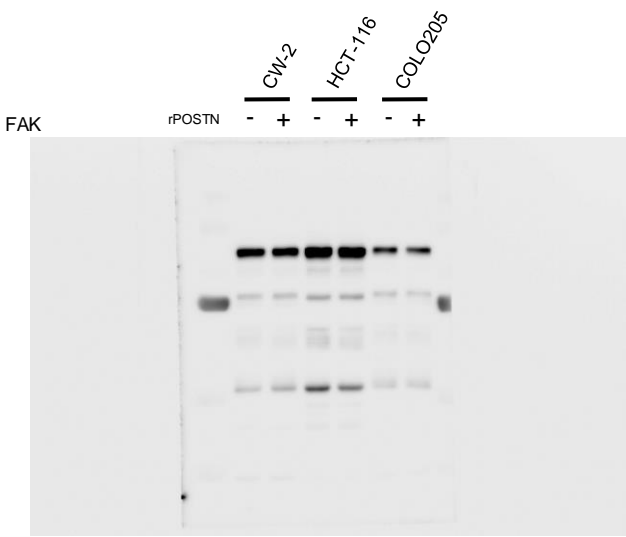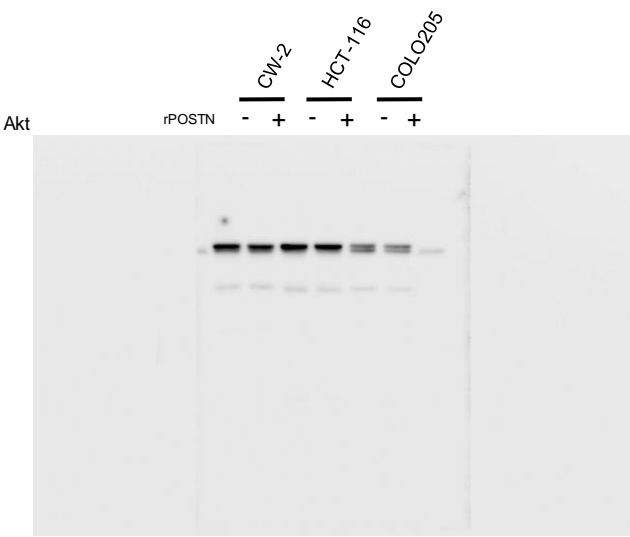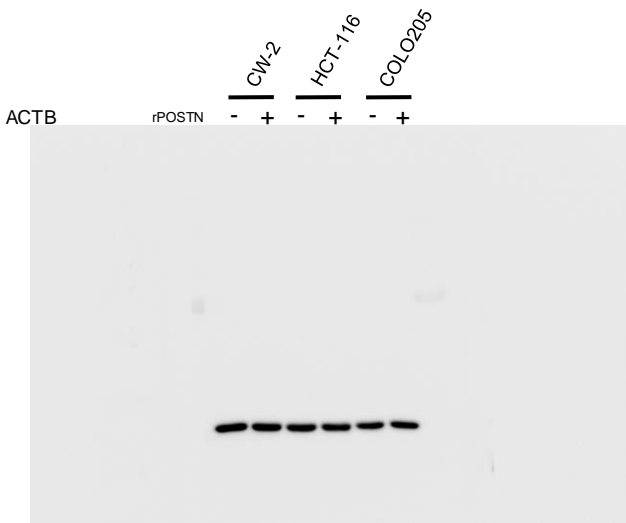

Figure 6a

NIH/3T3<sup>LacZ</sup>

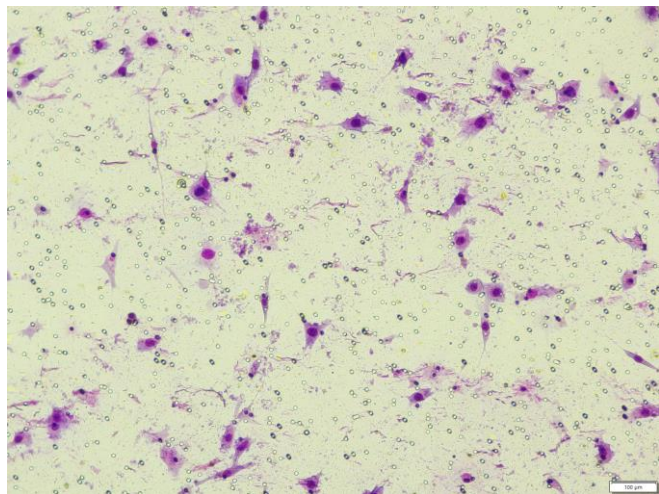

NIH/3T3<sup>POSTN</sup>

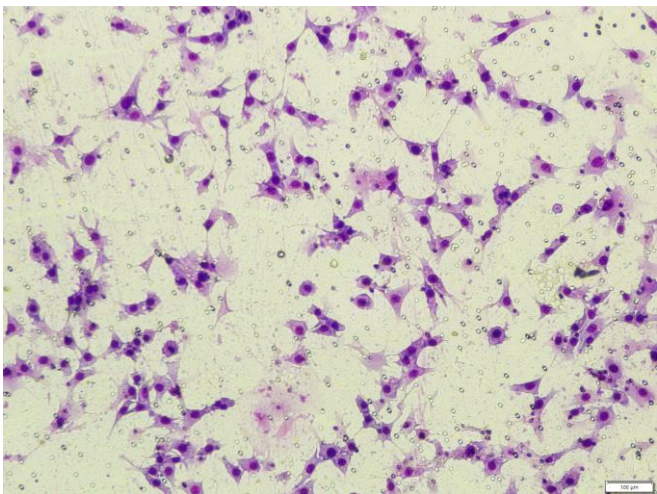

Figure 6d

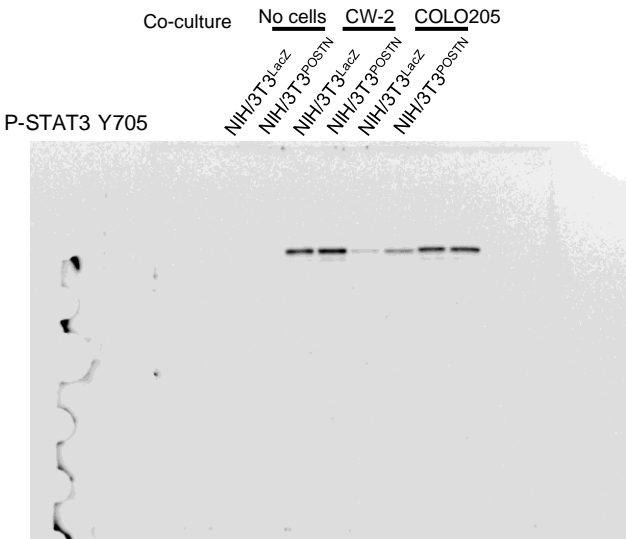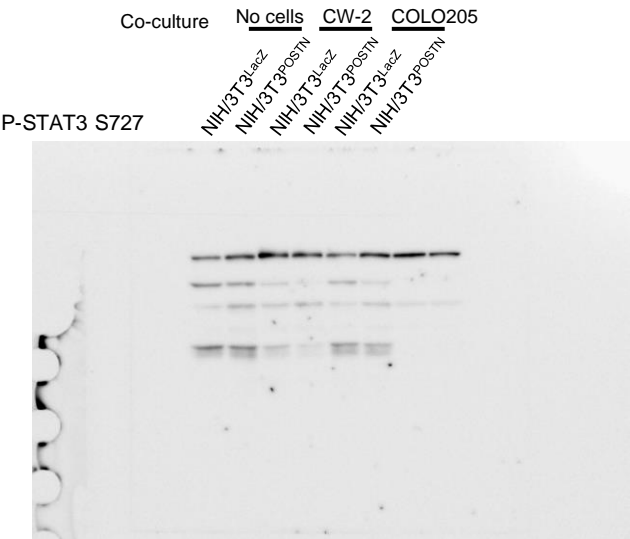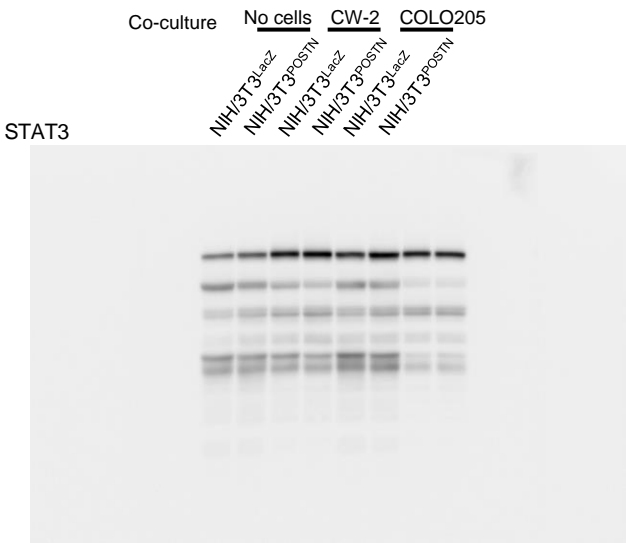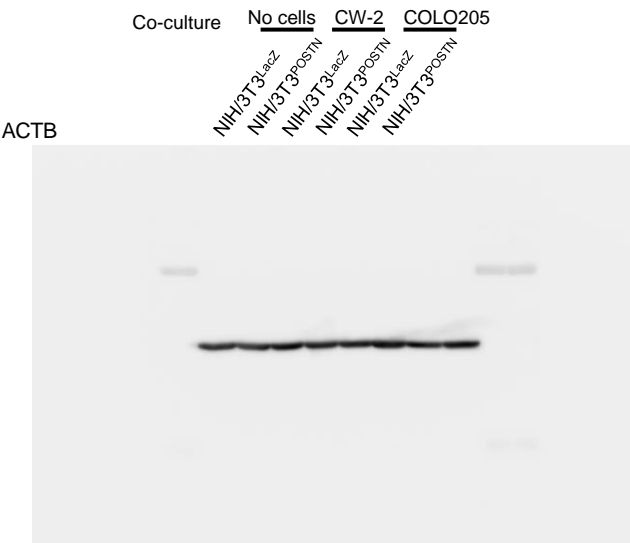

Supplement: s1 [file s1]
